# Supplementary material
Source: Elsevier journal article supplement (https://www.sciencedirect.com/science/article/pii/S0014256519302966)
Supplement: mmc1 [file S0014256519302966:mmc1.doc]

## ANEXO 1. Escalas e índices pronósticos

**Anexo 1a.** Clasificación GOLD de la gravedad de la limitación al flujo aéreo de la EPOC9

| **En pacientes con FEV1/FVC post-broncodilatador < 0.70** | | |
| --- | --- | --- |
| GOLD 1 | Leve | VEF1≥ 80% del valor teórico de referencia |
| GOLD 2 | Moderada | 50% ≤ VEF1< 80% del valor teórico de referencia |
| GOLD 3 | Grave | 30%≤ VEF1<50 % del valor teórico de referencia |
| GOLD 4 | Muy grave | VEF1 < 30% del valor teórico de referencia |

Anexo 1b. Escala de disnea modificada del Medical Research Council (*mMRC)*17

| 0 - Disnea sólo con ejercicio intenso |
| --- |
| 1 - Disnea al andar rápido o al subir cuestas ligeras. |
| 2 - Camina más lento que las personas de su edad o debe parar para respirar al andar a su paso en llano. |
| 3 - Tiene que parar tras andar 100 metros o después de andar pocos minutos en llano. |
| 4 - No puede salir de su casa o tiene disnea al vestirse o desnudarse. |

**Anexo 1c.** Índice de Charlson ajustado por edad

El índice de Charlson fue descrito por Charlson y colaboradores en 198716. El término ajustado por edad hace referencia supone que, por cada década superior a los 50 años, se añade un punto al valor total del Charlson***.*** El índice puede adoptar como valor mínimo 0 y como valor máximo 37. Valores entre 0 y 1 se consideran ausencia de comorbilidad, entre 0 y 2 comorbilidad baja y ≥ 3 comorbilidad alta.

**1. Sumar 1 punto por cada una de las enfermedades siguientes:**

Cardiopatía isquémica

Insuficiencia cardiaca

Enfermedad vascular periférica

Enfermedad vascular cerebral (accidente isquémico transitorio o déficit discreto)

Demencia

Enfermedad pulmonar obstructiva crónica

Enfermedad del tejido conectivo

Úlcera péptica

Enfermedad hepática leve (cirrosis hepática sin hipertensión portal/hepatitis crónica)

Diabetes en tratamiento con antidiabéticos orales o insulina

Insuficiencia renal (creatinina entre 2 – 3 mg/dl)

**2. Sumar 2 puntos por cada una de las enfermedades siguientes:**

Hemiplejia

Insuficiencia renal (creatinina > 3 mg/dl o diálisis)

Diabetes con nefropatía, retinopatía o neuropatía

Neoplasia

Leucemia

Linfoma

**3. Sumar 3 puntos por:**

Cirrosis hepática con hipertensión portal

**4. Sumar 6 puntos por:**

Cáncer sólido con metástasis

SIDA
